# Supplementary material for: Vitamin D supplementation in chronic spinal cord injury (VitD-SCI): study protocol for a randomised controlled trial
Source: PubMed Central journal article supplement — BMJ Open. 2021 Dec 16;11(12):e053951. doi: 10.1136/bmjopen-2021-053951 (PMC8685947; doi:10.1136/bmjopen-2021-053951), 2021-12-16
Supplement: bmjopen-2021-053951supp002.pdf [file bmjopen-2021-053951supp002.pdf]

## Supplement 2: Participant information and informed consent form.

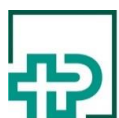

Schweizer Paraplegiker Zentrum  
Centre suisse des paraplégiques  
Centro svizzero per paraplegici  
Swiss Paraplegic Centre

### Vitamin-D-Supplementierung bei Personen mit einer chronischen Querschnittlähmung (*Vitamin D supplementation in individuals with a chronic spinal cord injury – a placebo-controlled randomized double-blinded study*)

Sehr geehrte Dame, sehr geehrter Herr,

Wir möchten Sie anfragen, ob Sie an einer klinischen Studie teilnehmen wollen. Im Folgenden wird Ihnen dieses Studienvorhaben dargestellt: Zunächst in einer kurzen Zusammenfassung, damit Sie wissen, um was es geht, anschliessend in einer detaillierten Beschreibung.

#### Zusammenfassung

|   |                                                                                                                                                                                                                                                                                                                                                                                                                                                                                                                                                                                                                                                                                                                                                                                                                                                                                                                                                                                                                                                                                                                                                                                                                                      |
|---|--------------------------------------------------------------------------------------------------------------------------------------------------------------------------------------------------------------------------------------------------------------------------------------------------------------------------------------------------------------------------------------------------------------------------------------------------------------------------------------------------------------------------------------------------------------------------------------------------------------------------------------------------------------------------------------------------------------------------------------------------------------------------------------------------------------------------------------------------------------------------------------------------------------------------------------------------------------------------------------------------------------------------------------------------------------------------------------------------------------------------------------------------------------------------------------------------------------------------------------|
| 1 | <p><b>Ziel der Studie</b><br/>Diese Studie untersucht den Einfluss einer zwölfmonatigen Vitamin-D-Supplementierung (Glossar, Seite 8) auf den Vitamin-D-Spiegel von Personen mit einer chronischen Querschnittlähmung.</p>                                                                                                                                                                                                                                                                                                                                                                                                                                                                                                                                                                                                                                                                                                                                                                                                                                                                                                                                                                                                           |
| 2 | <p><b>Auswahl</b><br/>Wir suchen Personen im Alter von 18 bis 60 Jahren mit einer chronischen sub-C4 Querschnittlähmung (d.h. drei oder mehr Jahre sind seit der Diagnose vergangen und die Läsionshöhe ist unterhalb C4), die im Alltag auf einen Rollstuhl angewiesen sind.</p>                                                                                                                                                                                                                                                                                                                                                                                                                                                                                                                                                                                                                                                                                                                                                                                                                                                                                                                                                    |
| 3 | <p><b>Allgemeine Informationen zur Studie</b><br/>Dies ist eine doppelblinde, randomisierte, Placebo-kontrollierte, klinische Studie (Glossar, Seite 8). Diese Studie wird organisiert durch das Schweizer Paraplegiker-Zentrum (SPZ), mit Dr. sc. nat. Joëlle Flück als Studienleiterin (Sponsor-Investigator).<br/>Studienteilnehmende mit einem ausreichenden Vitamin-D-Spiegel zu Beginn der Studie werden der natürlichen Zeitverlaufgruppe zugeordnet und erhalten keine Supplementierung.<br/>Studienteilnehmende, bei welchen zu Beginn der Studie ein Vitamin-D-Mangel diagnostiziert wurde, werden zufällig ("randomisiert") einer der drei Interventionsgruppen zugeordnet. Diese Studienteilnehmenden bekommen entweder eine "niedrige" Vitamin-D-Dosierung (24'000 IE/Monat), eine "hohe" Vitamin-D-Dosierung (48'000 IE/Monat) oder ein Placebo. Als Supplement wird das handelsübliche Vi-De 3<sup>®</sup> Monatsdosis (Glossar, Seite 8) von Dr. Wild &amp; Co. AG abgegeben. Das Placebo enthält die gleiche alkoholische Lösung (5 mL) wie das Supplement, aber ohne Wirkstoff. Pro Gruppe haben wir geplant 15 Studienteilnehmende zu untersuchen, was zu einer Gesamtzahl von 60 Studienteilnehmenden führt.</p> |
| 4 | <p><b>Ablauf</b><br/>Mittels einer Blutanalyse während der ersten Studienvisite wird Ihr Vitamin-D-Spiegel bestimmt. Studienteilnehmende mit einem ausreichenden Vitamin-D-Spiegel werden der natürlichen Zeitverlaufgruppe zugeordnet und erhalten keine Supplementierung. Studienteilnehmende mit einem Vitamin-D-Mangel werden zufällig einer der drei Interventionsgruppen zugeordnet. Das Supplement bzw. das Placebo sollen alle zwei Wochen über 12 Monate eingenommen werden. Erst nach Studienabschluss werden Sie, sowie auch die Studienmitarbeiter, herausfinden, in welche der Interventionsgruppen Sie zugeordnet waren. Abhängig von der Gruppe, in der Sie sich befinden, umfasst die Studie drei (natürliche Zeitverlaufgruppe) oder fünf (Interventionsgruppen) Studienvisiten von 1.5 bis 2.0 Stunden im SPZ. Während den Studienvisiten werden folgende Messungen durchgeführt: Knochendichte, Blutentnahme, Handkraft sowie Ausfüllen verschiedener Fragebögen.</p>                                                                                                                                                                                                                                             |

|    |                                                                                                                                                                                                                                                                                                                                                                                                                                                                                                                                                                                                                                                                                                                                                                                                                |
|----|----------------------------------------------------------------------------------------------------------------------------------------------------------------------------------------------------------------------------------------------------------------------------------------------------------------------------------------------------------------------------------------------------------------------------------------------------------------------------------------------------------------------------------------------------------------------------------------------------------------------------------------------------------------------------------------------------------------------------------------------------------------------------------------------------------------|
| 5  | <p><b>Nutzen</b></p> <p>Bei allen Studienteilnehmenden werden der Vitamin-D-Spiegel sowie alle weiteren Messwerte regelmässig überprüft. Werden Sie in einer der Interventionsgruppen eingeteilt und bekommen Sie das Vitamin-D-Supplement, wird Ihr Vitamin-D-Mangel mit grosser Wahrscheinlichkeit während der Studie behoben. Sofern Studienteilnehmende dies wünschen, werden die individuellen Studienresultate nach Beendigung der gesamten Studie zusammengestellt und besprochen. Dies könnte genutzt werden, um später die Vitamin-D-Supplementation individuell zu optimieren und auf die eigenen Bedürfnisse anzupassen. Wir erhoffen uns, dass wir anhand der gewonnen Erkenntnisse dieser Studie, die Richtlinien zur Verabreichung von Vitamin D bei Querschnittgelähmten verbessern können.</p> |
| 6  | <p><b>Rechte</b></p> <p>Sie entscheiden freiwillig, ob Sie an der Studie teilnehmen wollen oder nicht. Ihre Entscheidung hat keinen Einfluss auf Ihre medizinische Behandlung und Sie müssen diese Entscheidung nicht begründen.</p>                                                                                                                                                                                                                                                                                                                                                                                                                                                                                                                                                                           |
| 7  | <p><b>Pflichten</b></p> <p>Wenn Sie bei der Studie mitmachen, müssen Sie bestimmte Regeln beachten. Dies ist notwendig für Ihre Sicherheit und Gesundheit. Wir werden Sie dabei so gut wie möglich unterstützen. Als Studienteilnehmende sind Sie unter anderem verpflichtet, den (medizinischen) Anweisungen der Studienmitarbeiter zu folgen und sich an den Studienplan (z.B. Einnahme des Supplements) zu halten.</p>                                                                                                                                                                                                                                                                                                                                                                                      |
| 8  | <p><b>Risiken</b></p> <p>Das Risiko dieser Studie ist minimal. Die Messungen werden von spezialisierten Mitarbeitern durchgeführt. Ausserdem sind im SPZ sind alle notwendigen Sicherheitsmassnahmen vorhanden.</p>                                                                                                                                                                                                                                                                                                                                                                                                                                                                                                                                                                                            |
| 9  | <p><b>Andere Behandlungsmöglichkeiten</b></p> <p>Sie müssen bei dieser Studie nicht teilnehmen. Neben Vitamin-D-Supplementen, welche rezeptfrei gekauft werden können, könnte auch Sonnenexposition dazu beitragen, Ihren Vitamin-D-Spiegel zu verbessern.</p>                                                                                                                                                                                                                                                                                                                                                                                                                                                                                                                                                 |
| 10 | <p><b>Ergebnisse</b></p> <p>Bei Studienergebnissen und Zufallsbefunden während der Studie werden Sie informiert, wenn diese Ergebnisse für Sie gesundheitlich wichtig sind. Falls Sie dies nicht möchten, informieren Sie bitte einen Studienmitarbeiter.</p>                                                                                                                                                                                                                                                                                                                                                                                                                                                                                                                                                  |
| 11 | <p><b>Vertraulichkeit von Daten und Proben</b></p> <p>Wir halten alle gesetzlichen Regeln des Datenschutzes ein und alle Beteiligten unterliegen der Schweigepflicht. Ihre persönlichen und medizinischen Daten sowie Ihre Proben werden verschlüsselt verwendet. Die Daten und Proben werden nur für andere Forschungsprojekte weiter verwendet, wenn Sie Ihr separates Einverständnis dafür geben.</p>                                                                                                                                                                                                                                                                                                                                                                                                       |
| 12 | <p><b>Rücktritt</b></p> <p>Sie können jederzeit von der Studie zurücktreten und nicht mehr teilnehmen. Die bis dahin erhobenen Daten und Proben werden noch ausgewertet, weil das ganze Projekt sonst seinen Wert verliert.</p>                                                                                                                                                                                                                                                                                                                                                                                                                                                                                                                                                                                |
| 13 | <p><b>Entschädigung</b></p> <p>Alle Studienteilnehmenden bekommen eine Reisespesenentschädigung. Sie erhalten zusätzlich keine weitere finanzielle Entschädigung.</p>                                                                                                                                                                                                                                                                                                                                                                                                                                                                                                                                                                                                                                          |
| 14 | <p><b>Haftung</b></p> <p>Die Studienversicherung des SPZ (Basler Versicherungen) kommt für Schäden im Rahmen der Studie auf.</p>                                                                                                                                                                                                                                                                                                                                                                                                                                                                                                                                                                                                                                                                               |

|    |                                                                                                                                                                                                                                                  |
|----|--------------------------------------------------------------------------------------------------------------------------------------------------------------------------------------------------------------------------------------------------|
| 15 | <b>Finanzierung</b><br>Die Studie wird von der SPZ und Schweizer Paraplegiker-Stiftung bezahlt.                                                                                                                                                  |
| 16 | <b>Kontaktperson</b><br>Dr. Anneke Hertig-Godeschalk<br>Studienkoordinatorin<br><a href="mailto:anneke.hertig@paraplegie.ch">anneke.hertig@paraplegie.ch</a><br>+41 41 939 66 03<br>Sportmedizin, SPZ<br>Guido A. Zäch-Strasse 1<br>6207 Nottwil |

## Studieninformation

### 1. Ziel der Studie

Wir wollen mit dieser Studie den Einfluss einer zwölfmonatigen Vitamin-D-Supplementierung (Glossar, Seite 8) auf den Vitamin-D-Spiegel von Personen mit einer chronischen Querschnittlähmung untersuchen. Nebst dem Vitamin-D-Spiegel im Blut, werden auch diverse weitere physische und psychische Messwerte untersucht. Diese Studie soll dazu beitragen, Querschnittgelähmte optimal bezüglich einer Vitamin-D-Supplementation zu beraten.

### 2. Auswahl

Es können alle Personen teilnehmen, die eine chronische sub-C4 Querschnittlähmung haben (d.h. drei oder mehr Jahre sind seit der Diagnose vergangen und die Läsionshöhe ist unterhalb C4) und im Alltag auf einen Rollstuhl angewiesen sind. Ausserdem müssen Sie zwischen 18 und 60 Jahre alt und ansonsten gesund sein. Falls Sie an einer bekannten Resorptionsstörung, Erkrankung der Schilddrüse oder Niereninsuffizienz leiden, dürfen Sie nicht an der Studie teilnehmen. Sie sollten in den letzten 12 Monaten vor Einschluss in die Studie keine Vitamin-D-Supplemente zu sich genommen haben. Sollten Sie sich im letzten Monat auf der südlichen Halbkugel aufgehalten haben, also z.B. in Süd-Afrika, Australien, Mittel- oder Südamerika, oder sollten Sie einen solchen Aufenthalt im Zeitraum der Studie geplant haben, können Sie nicht teilnehmen. Frauen, die schwanger sind oder stillen, werden aus Sicherheitsgründen von einer Teilnahme ausgeschlossen.

### 3. Allgemeine Informationen

Ein Vitamin-D-Mangel wird mit verschiedenen gesundheitlichen Risiken, unter anderem einer verminderten Muskelfunktion sowie einem vermehrten Auftreten von Depressionen in Verbindung gebracht. Unter Querschnittgelähmten ist ein Vitamin-D-Mangel sehr stark verbreitet. Eine Supplementierung mit Vitamin D kann zu einem optimalen Vitamin-D-Spiegel führen, doch nur wenn eine ausreichende Dosierung verabreicht wird. Erkenntnisse zu diesem Thema liegen bis jetzt nur aus Studien mit Fussgängern vor, welche aufgrund verschiedener körperlicher Unterschiede, beispielsweise bei der Verdauung und der Körperzusammensetzung, nicht immer eins zu eins auf Querschnittgelähmte übertragen werden können. Ausserdem sind die wenigen Studien, die es im Bereich Querschnittlähmung dazu gibt, in ihre Aussagekraft eingeschränkt: Sie laufen meistens nur über eine kurze Zeit und beziehen sich auf eine begrenzte Anzahl von Messwerten.

In der aktuellen Studie werden wir den Effekt einer Vitamin-D-Supplementierung über 12 Monate untersuchen. Dies ist eine doppelblinde, randomisierte, Placebo-kontrollierte, klinische Studie (Glossar, Seite 8), die im SPZ durchgeführt wird. Studienteilnehmende mit einem ausreichenden Vitamin-D-Spiegel zu Beginn der Studie werden der natürlichen Zeitverlaufgruppe zugeordnet und erhalten keine Supplementierung. Studienteilnehmende, bei welchen zu Beginn der Studie ein Mangel an Vitamin D diagnostiziert wurde, werden zufällig ("randomisiert") auf die drei Interventionsgruppen verteilt. Diese Studienteilnehmenden bekommen entweder eine "niedrige" Vitamin-D-Dosierung (24'000 IE/Monat), eine "hohe" Vitamin-D-Dosierung (48'000 IE/Monat) oder ein Placebo. Als Supplement wird das handelsübliche Vi-De 3<sup>®</sup> Monatsdosis (Glossar, Seite 8) von Dr. Wild & Co. AG abgegeben. Vi-De 3<sup>®</sup> Monatsdosis ist eine 5 mL alkoholische Lösung mit Mono-Vitamin D3. Die vorgeschlagenen Dosierungen sind im Rahmen der Supplementierungs-Richtlinien (600 bis 2000 IE/Tag), übersteigen die höchst tolerierte Tagesdosis (10'000 IE/Tag) nicht und sind weit unter der Schwelle, welche zu einer Vergiftung führen kann (40'000 bis 100'000 IE/Tag über 1-2 Monate). Die Placebo-Gruppe erhält die gleiche alkoholische Lösung (5 mL) wie die Interventionsgruppen, aber ohne Wirkstoff.

Das Vitamin D bzw. das Placebo soll alle zwei Wochen über 12 Monate, aufgelöst in einem Glas Wasser, eingenommen werden. Pro Gruppe haben wir geplant, 15 Studienteilnehmende zu untersuchen, was zu einer Gesamtzahl von 60 Studienteilnehmenden führt.

Wir machen diese Studie so, wie es die Gesetze in der Schweiz vorschreiben. Ausserdem beachten wir alle international anerkannten Richtlinien. Die zuständige Kantonale Ethikkommission und Swissmedic haben die Studie geprüft und bewilligt. Eine Beschreibung dieser Studie finden Sie auch auf der Internetseite des Bundesamtes für Gesundheit ([www.kofam.ch](http://www.kofam.ch), Registriernummer: SNCTP000004032) sowie unter [www.clinicaltrials.gov](http://www.clinicaltrials.gov) (Registriernummer: NCT04652544).

#### 4. Ablauf

Im Rahmen des Screening-Termins (telefonisch oder im SPZ) werden wir überprüfen, ob Sie die Ein- und Ausschlusskriterien erfüllen. Bei gebärfähigen Frauen wird ein Urin-Schwangerschaftstest durchgeführt und während der Studie eine Schwangerschaftsverhütung verlangt. Falls Sie alle Kriterien erfüllen und Sie sich zu einer Studienteilnahme entscheiden, werden wir Ihnen weitere Studieninformationen und die Einverständniserklärung zustellen, welche Sie bei der ersten Studienvisite unterschrieben zurückbringen müssen. Mittels einer Blutanalyse während der ersten Studienvisite wird Ihr Vitamin-D-Spiegel bestimmt. Bei einem ausreichenden Vitamin-D-Spiegel zu Beginn der Studie werden Sie der natürlichen Zeitverlaufgruppe zugeordnet und erhalten keine Supplementierung. Bei einem Vitamin-D-Mangel zu Beginn der Studie werden Sie zufällig einer der drei Interventionsgruppen zugeordnet und erhalten entweder eine "niedrige" Vitamin-D-Dosierung, eine "hohe" Vitamin-D-Dosierung oder ein Placebo. Erst nach Studienabschluss werden Sie, sowie auch die Studienmitarbeiter, herausfinden, in welche der Interventionsgruppen Sie zugeordnet waren. Die Einnahme des Supplements, müssen Sie mittels einem Tagebuch dokumentieren. Abhängig von der Gruppe, in der Sie sich befinden, umfasst die Studie drei (natürliche Zeitverlaufgruppe) oder fünf (Interventionsgruppen) Studienvisiten von 1.5 bis 2.0 Stunden im SPZ, während denen die folgenden Messungen durchgeführt werden:

- Knochendichte mittels DXA ("dual energy X-ray absorptiometry"). DXA ist eine spezielle Art der Röntgenuntersuchung. Die Messung dauert nur wenige Minuten, ist absolut schmerzfrei und nur mit einer sehr geringen Strahlenbelastung verbunden. Messungen des Unterarms, der Hüfte und des Knies werden nur bei der ersten und letzten Visite durchgeführt.
- Blutentnahme (15 mL venös in Armbeuge) zur Bestimmung von u.a. Vitamin-D- und Kalzium- Werten.
- Handkraft wird an beiden Händen mit einem Dynamometer (Handkraftmesser) gemessen. Das Messgerät besteht aus einem Griff und einem Belastungsmesser, der während der Messung so kräftig wie möglich zusammengedrückt werden sollte. Diese Messung wird nur unter Studienteilnehmende durchgeführt, die sie erfolgreich machen können, also unter Studienteilnehmende die von der Lähmungshöhe her über eine entsprechende Handfunktion verfügen.
- Verschiedene weiteren Messwerte (Stürze, Schmerzen, Stimmung, Sonneneinstrahlung) werden mittels Fragebögen erhoben.

Daneben wird unter den Studienteilnehmenden der Interventionsgruppen jeden Monat telefonisch oder via E-Mail eine 15-minütige Befragung zur Überprüfung der Einnahme und der Verträglichkeit des Supplements durchgeführt.

Es kann sein, dass wir Sie von der Studie vorzeitig ausschliessen müssen. Das kann zum Beispiel geschehen, wenn Ihr Vitamin-D-Spiegel eine Obergrenze ( $> 375$  nmol/L) überschreitet. In diesem Fall werden Sie zu Ihrer Sicherheit abschliessend noch einmal untersucht. Bitte bringen Sie dann alle Produkte, die wir Ihnen gegeben haben, zu uns zurück.

#### 5. Nutzen

Bei allen Studienteilnehmenden werden der Vitamin-D-Spiegel sowie weitere Messwerte regelmässig überprüft. Nach Abschluss der Studie kann man Rückschlüsse ziehen, ob bei einer Supplementierung die gemessenen Werte besser sind. Werden Sie in eine der Interventionsgruppen eingeteilt und bekommen Sie das Vitamin-D-Supplement, wird Ihr Vitamin-D-Mangel mit grosser Wahrscheinlichkeit während der Studie behoben. Sofern Studienteilnehmende dies wünschen, werden die individuellen Studienresultate nach Beendigung der gesamten Studie zusammengestellt und besprochen. Dies könnte genutzt werden, um später die Vitamin-D-Supplementierung individuell zu optimieren und auf die eigenen Bedürfnisse anzupassen.

Wir erhoffen uns, dass wir anhand der gewonnenen Erkenntnisse dieser Studie, die Richtlinien zur Verabreichung von Vitamin D bei Querschnittgelähmten verbessern können.

## 6. Rechte

Sie nehmen freiwillig teil. Wenn Sie nicht mitmachen oder später Ihre Teilnahme zurückziehen wollen, müssen Sie dies nicht begründen. Ihre medizinische Behandlung/Betreuung ist unabhängig von Ihrem Entscheid gewährleistet. Sie dürfen jederzeit Fragen zur Studienteilnahme sowie zur Studie selber stellen. Wenden Sie sich dazu bitte an eine der Personen, die am Ende dieser Information genannt ist.

## 7. Pflichten

Wenn Sie bei der Studie mitmachen, müssen Sie bestimmte Regeln beachten. Dies ist notwendig für Ihre Sicherheit und Gesundheit. Wir werden Sie dabei so gut wie möglich unterstützen. Als Studienteilnehmende sind Sie verpflichtet:

- den (medizinischen) Anweisungen der Studienmitarbeiter zu folgen und sich an den Studienplan (z.B. Einnahme des Supplements) zu halten.
- uns mitzuteilen, wenn sich ihre Pläne bezüglich eines Auslandsaufenthalts auf der südlichen Halbkugel (z. B: Mittel- oder Südafrika, Mittel- oder Südamerika, Australien) während der Studienzeit ändern.
- uns über das Vorhandensein/den Verlauf einer allfälligen Erkrankung und über neue Symptome, neue Beschwerden und Änderungen im Befinden (auch nach Studienende/-abbruch, bis die unerwünschte Wirkung abklingt) zu informieren.
- uns über die gleichzeitige Behandlung und Therapien bei einem anderen Arzt und über die Einnahme von Medikamenten zu informieren. Nennen Sie dabei bitte alle Medikamente, d. h. auch solche, die Sie selbst gekauft haben, für die Sie kein Rezept brauchen sowie Medikamente der Alternativmedizin.
- uns mitzuteilen, wenn Sie während der Studie oder innerhalb von 30 Tage nach Studienende Schwanger wurden.

Bitte bringen Sie, wenn Sie zu einer Studienvisite ins SPZ kommen, alle Packungen des Supplements mit, die wir Ihnen gegeben haben. Damit gemeint sind einerseits die leeren, andererseits aber auch die eventuell noch vollen Packungen.

Wenn Sie die Pflichten nicht beachten, können Sie Haftungsansprüche verlieren.

## 8. Risiken und Belastungen für die Studienteilnehmende

Die Messungen werden von spezialisierten Mitarbeitern durchgeführt. Ausserdem sind im SPZ alle notwendigen Sicherheitsmassnahmen vorhanden.

Das Vitamin-D-Supplement sowie das Placebo enthalten eine alkoholische Lösung (65 Volumenprozent Ethanol), was einen geringen Einfluss auf die Fahrtüchtigkeit oder die Fähigkeit, Maschinen zu bedienen, haben kann. Vitamin D ist in grossen Mengen giftig. Die höchste Dosierung in unserer Studie übersteigt die höchste tolerierte Tagesdosis nicht und ist weit unter der Schwelle, welche zu einer Vergiftung führen kann. Bei unserer Dosierung sind somit keinerlei Nebenwirkungen zu erwarten. Mittels der Blutuntersuchung werden wir Ihren Vitamin-D-Spiegel während der ganzen Studie beobachten. Bitte wenden Sie sich an einen Studienmitarbeiter, falls Sie eines der folgenden Anzeichen einer Vitamin-D-Überdosierung bemerken: Übelkeit, Erbrechen, Durchfall, Verstopfung, Anorexie, Müdigkeit, Kopfschmerzen, Muskel- und Gelenkschmerzen, Muskelschwäche oder Schläfrigkeit. Wenn Sie in die Placebo-Gruppe zugeordnet werden, wird Ihr Vitamin-D-Mangel mit

grosser Wahrscheinlichkeit bis am Ende der Studie weiterexistieren. Dies birgt aber keine zusätzlichen Risiken im Vergleich zur Situation vor der Studienteilnahme.

Durch die Blutentnahme in der Armbeuge können lokal leichte Entzündungen auftreten. Durch die Messung der Knochendichte am Unterarm (0.010 mSv), an der Hüfte (0.146 mSv) und am Knie (0.034 mSv) werden Sie einer minimalen Röntgenstrahlung ausgesetzt (2 Messungen x 0.190 = 0.380 mSv). Im Vergleich dazu beträgt die jährlichen radioaktiven Strahlenlast für die Schweizer Bevölkerung durch Radon durchschnittlich 3.200 mSv. Sollten Sie während der Studie schwanger werden, müssen Sie die Studienmitarbeiter sofort informieren und dürfen nicht weiter an der Studie teilnehmen.

## 9. Andere Behandlungsmöglichkeiten

Sie müssen bei dieser Studie nicht teilnehmen. Neben Vitamin-D-Supplementen, welche rezeptfrei gekauft werden können, könnte auch Sonnenexposition dazu beitragen, Ihren Vitamin-D-Spiegel zu verbessern.

## 10. Ergebnisse aus der Studie

Die Studienmitarbeiter werden Sie während der Studie über alle neuen Erkenntnisse informieren, die den Nutzen der Studie oder Ihre Sicherheit und somit Ihr Einwilligung zur Teilnahme an der Studie beeinflussen können. Sie werden die Informationen mündlich und schriftlich erhalten.

Bei Zufallsbefunden, die bei Ihnen zur Verhinderung, Feststellung und Behandlung bestehender oder künftig zu erwartender Krankheiten beitragen können, werden Sie informiert. Wenn Sie nicht informiert werden wollen, sprechen Sie bitte mit einem Studienmitarbeiter.

### 11. Vertraulichkeit der Daten und Proben

Für diese Studie werden Ihre persönlichen und medizinischen Daten erfasst. Nur sehr wenige Fachpersonen werden Ihre unverschlüsselten Daten sehen, und zwar ausschliesslich, um Aufgaben im Rahmen der Studie zu erfüllen. Bei der Datenerhebung zu Studienzwecken werden die Daten verschlüsselt. Verschlüsselung bedeutet, dass alle Bezugsdaten, die Sie identifizieren könnten (Name, Geburtsjahr), gelöscht und durch einen Schlüssel ersetzt werden. Die Schlüssel-Liste bleibt immer im SPZ. Diejenigen Personen, die den Schlüssel nicht kennen, können daher keine Rückschlüsse auf Ihre Person ziehen. Ihr Name taucht niemals im Internet oder einer Publikation auf. Manchmal gibt es die Vorgabe bei einer Zeitschrift zur Publikation, dass Einzel-Daten (sogenannte Roh-Daten) übermittelt werden müssen. Wenn Einzel-Daten übermittelt werden müssen, dann sind die Daten immer verschlüsselt und somit ebenfalls nicht zu Ihnen als Person rückverfolgbar. Bei einer Publikation sind die zusammengefassten Daten daher auch nicht auf Sie als Einzelperson rückverfolgbar. Alle Personen, die im Rahmen der Studie Einsicht in Ihre Daten haben, unterliegen der Schweigepflicht. Die Vorgaben des Datenschutzes werden eingehalten und Sie als teilnehmende Person haben jederzeit das Recht auf Einsicht in Ihre Daten.

Möglicherweise wird diese Studie durch die zuständige Ethikkommission, die Arzneimittelbehörde Swissmedic oder durch die Institution, die die Studie veranlasst hat, überprüft. Die Studienmitarbeiter müssen eventuell Ihre persönlichen und medizinischen Daten für solche Kontrollen offenlegen. Ebenso kann es sein, dass bei Schäden ausnahmsweise auch ein Vertreter der Versicherung Ihre Daten ansehen muss. Alle Personen müssen absolute Vertraulichkeit wahren.

Im Rahmen dieses Projektes werden Daten erhoben bzw. Messungen durchgeführt, welche auch für Ihren behandelnden Arzt und damit Ihre persönliche, medizinische Betreuung im SPZ von Interesse sein können. Deshalb werden diese Daten (z.B. Blutwerte) auch in Ihrer elektronischen Krankenakte gespeichert. Dies dient in erster Linie dazu, doppelte Untersuchungen und damit auch Ihre Belastung durch Untersuchungen zu verringern.

### 12. Rücktritt

Sie können jederzeit aufhören und von der Studie zurücktreten, wenn Sie das wünschen. Die bis dahin erhobenen Daten und Proben werden noch verschlüsselt ausgewertet, weil das ganze Projekt sonst seinen Wert verliert. Prüfen Sie bitte, ob Sie damit einverstanden sind, bevor Sie bei der Studie mitmachen.

### 13. Entschädigung für die Studienteilnehmende

Die in dieser Studieninformation erwähnten studienspezifischen Untersuchungen sind kostenlos. Weder Ihnen noch Ihrer Krankenkasse entstehen im Zusammenhang mit Ihrer Teilnahme Kosten. Das Vitamin-D-Supplement sowie Placebo werden kostenlos zu Verfügung gestellt. Alle Studienteilnehmende bekommen eine Reisespesenentschädigung (CHF50 pro Studienvisite). Sie erhalten zusätzlich keine weitere finanzielle Entschädigung.

### 14. Haftung

Die Institution (SPZ), die die Studie veranlasst hat und für die Durchführung verantwortlich ist, haftet für Schäden, welche Ihnen im Zusammenhang mit der getesteten Substanz oder Forschungshandlungen (z.B. Untersuchungen) entstehen könnten. Die Voraussetzungen und das Vorgehen dazu sind gesetzlich geregelt. Die SPZ hat dazu eine Versicherung bei der Basler Versicherungen (Aeschengraben 21, 4002 Basel) abgeschlossen, um in einem möglichen Schadenfall für die Haftung aufkommen zu können. Bei Schäden, die auf ein zugelassenes und gemäss dem medizinischen Standard angewendetes Heilmittel zurückzuführen sind oder welche im Rahmen der Placebo-Verwendung auftraten, greifen dieselben Haftungsregelungen wie bei einer Behandlung ausserhalb einer Studie. Falls Sie einen Schaden erlitten haben, so wenden Sie sich bitte an einen Studienmitarbeiter.

### 15. Finanzierung der Studie

Die Studie wird von der SPZ und Schweizer Paraplegiker-Stiftung bezahlt.

## 16. Kontaktpersonen

Bei Fragen, Unsicherheiten oder Notfällen, die während der Studie oder danach auftreten, können Sie sich jederzeit an eine dieser Kontaktpersonen wenden:

Dr. sc. nat. Joëlle Flück  
Studienleiterin  
[joelle.flueck@paraplegie.ch](mailto:joelle.flueck@paraplegie.ch)  
+41 41 939 66 17  
Sportmedizin  
Schweizer Paraplegiker-Zentrum  
Guido A. Zäch-Strasse 1  
6207 Nottwil

Dr. Anneke Hertig-Godeschalk  
Studienkoordinatorin  
[anneke.hertig@paraplegie.ch](mailto:anneke.hertig@paraplegie.ch)  
+41 41 939 66 03  
Sportmedizin  
Schweizer Paraplegiker-Zentrum  
Guido A. Zäch-Strasse 1  
6207 Nottwil

Bitte kontaktieren Sie in Notfällen Ihre örtlichen Notfalldienste.

## 17. Glossar; was heisst....

- *Was heisst "doppelblind"?*  
Eine Studie zu "verblinden" dient dazu, bessere und genauere Ergebnisse zu erhalten. "Doppelblind" ist eine Studie dann, wenn weder die Studienteilnehmenden noch die Forschenden wissen, ob Studienteilnehmende das echte Medikament oder das Placebo erhalten. Nur die unabhängige Person, die diese Zuordnung ausgelost hat, weiss, wer was erhält. Wenn der Test zu Ende ist, wird die "Verblindung" aufgelöst. In einem Notfall kann die "Verblindung" jederzeit auch früher aufgehoben werden. Ein Studienteilnehmer, der weiss, dass er das echte Medikament und nicht das Placebo erhält, achtet ganz anders auf Reaktionen des Körpers als jemand, der weiss, dass er nur das Placebo erhält. Dies kann dazu führen, dass Studienteilnehmende, die das echte Medikament erhalten, die Wirkung des Medikaments im Vergleich zu denjenigen, die nur das Placebo erhalten, überschätzen.
- *Was heisst "randomisiert"?*  
Bei vielen Studien werden zwei oder mehrere unterschiedliche Arten der Behandlung verglichen. Zum Beispiel vergleicht man ein echtes Medikament mit einem Placebo. Man bildet dann zwei Gruppen von Studienteilnehmenden, die einen bekommen das echte Medikament und die anderen das Placebo. „Randomisieren“ bedeutet, dass ausgelost wird, wer in welche Gruppe kommt. Es ist bei einem solchen Test also Zufall, ob man das echte Medikament erhält oder das Placebo.
- *Was heisst "Placebo"?*  
Ein Scheinmedikament, das so aussieht wie ein echtes und auch gleich verpackt ist, wie jenes das der Arzt verschreibt und zu dem es einen Beipackzettel gibt. Es ist aber kein Wirkstoff drin, sondern es besteht nur aus Wasser oder Zucker oder ähnlichem. Manchmal behandelt man einen Teil der Studienteilnehmenden an einem Medikamententest mit dem richtigen Medikament (mit dem Wirkstoff) und den anderen Teil mit einem solchen Placebo (ohne Wirkstoff). Dann kann man im Vergleich besser abschätzen, wie gut das Medikament tatsächlich wirkt. In dieser Studie besteht das Placebo aus der gleichen alkoholischen Lösung (5 mL, 65 Volumenprozent Ethanol) wie das Vitamin-D-Supplement, aber ohne Wirkstoff.
- *Was ist "Vitamin-D-Supplementierung"?*  
Unter Supplementierung versteht man die gezielte und ergänzende Versorgung mit einzelnen Nährstoffen, zusätzlich zur gewöhnlichen Nahrung. Die entsprechenden Produkte bezeichnet man als Supplement. Bei Vitamin-D-Supplementierung wird Vitamin D als Supplement eingenommen, zum Beispiel in Form einer Flüssigkeit oder einer Tablette.
- *Was ist "Vi-De 3® - Monatsdosis"?*  
Dies ist ein handelsübliches Vitamin-D-Supplement mit Wirkstoff Cholecalciferol (Mono-Vitamin D3), fabriziert von der Firma Dr. Wild & Co. AG. Vi-De 3® Monatsdosis ist eine 5 mL alkoholische Lösung (65 Volumenprozent Ethanol), was 2.600 g Alkohol pro Flasche entspricht. Zum Vergleich: 250 mL Apfelsaft enthält 0.165 g Alkohol.





## Einwilligungserklärung

### Schriftliche Einwilligungserklärung zur Teilnahme an einem Studienprojekt

Bitte lesen Sie dieses Formular sorgfältig durch. Bitte fragen Sie, wenn Sie etwas nicht verstehen oder wissen möchten. Für die Teilnahme ist Ihre schriftliche Einwilligung notwendig.

|                                                            |                                                                                  |
|------------------------------------------------------------|----------------------------------------------------------------------------------|
| <b>BASEC-Nummer:</b>                                       | 2020-01493                                                                       |
| <b>Titel der Studie:</b>                                   | Vitamin-D-Supplementierung bei Personen mit einer chronischen Querschnittlähmung |
| <b>Verantwortliche Institution:</b>                        | Schweizer Paraplegiker-Zentrum<br>Guido A. Zäch-Strasse 1<br>6207 Nottwil        |
| <b>Ort der Durchführung:</b>                               | Schweizer Paraplegiker-Zentrum<br>Guido A. Zäch-Strasse 1<br>6207 Nottwil        |
| <b>Verantwortliche Studienmitarbeiterin am Studienort:</b> | Dr. sc. nat. Joëlle Flück                                                        |
| <b>Studienteilnehmende:</b>                                | <input type="checkbox"/> weiblich <input type="checkbox"/> männlich              |
| <b>Name und Vorname in Druckbuchstaben:</b>                |                                                                                  |
| <b>Geburtsdatum:</b>                                       |                                                                                  |

- Ich wurde vom unterzeichnenden Studienmitarbeiter mündlich und schriftlich über den Zweck, den Ablauf der Studie, über mögliche Vor- und Nachteile sowie über eventuelle Risiken informiert.
- Ich nehme an dieser Studie freiwillig teil und akzeptiere den Inhalt der abgegebenen schriftlichen Information. Ich hatte genügend Zeit, meine Entscheidung zu treffen.
- Meine Fragen im Zusammenhang mit der Teilnahme an dieser Studie sind mir beantwortet worden. Ich behalte die schriftliche Information und erhalte eine Kopie meiner schriftlichen Einwilligungserklärung.
- Ich wurde über mögliche andere Behandlungen und Behandlungsverfahren aufgeklärt.
- Ich bin einverstanden, dass die zuständigen Fachleute des Sponsors, der zuständigen Ethikkommission und der Arzneimittelbehörde Swissmedic zu Prüf- und Kontrollzwecken in meine unverschlüsselten Daten Einsicht nehmen dürfen, jedoch unter strikter Einhaltung der Vertraulichkeit.
- Bei Studienergebnissen oder Zufallsbefunden, die direkt meine Gesundheit betreffen, werde ich informiert. Wenn ich das nicht wünsche, informiere ich einen Studienmitarbeiter.
- Ich weiss, dass meine gesundheitsbezogenen und persönlichen Daten (und Proben) nur in verschlüsselter Form zu Forschungszwecken für diese Studie weitergegeben werden können, eventuell auch ins Ausland.
- Im Fall einer Weiterbehandlung ausserhalb des Studienzentrums ermächtige ich meinen/meine nachbehandelnden Arzt/Ärzte, meine für die Studie relevanten Nachbehandlungsdaten dem Studienmitarbeiter zu übermitteln.
- Ich kann jederzeit und ohne Angabe von Gründen von der Studienteilnahme zurücktreten. Meine weitere medizinische Behandlung ist unabhängig von der Studienteilnahme immer gewährleistet. Die bis zum Rücktritt erhobenen Daten und Proben werden für die Auswertung zur Studie verwendet.
- Ich bin darüber informiert, dass eine Versicherung Schäden deckt, die auf die Studie zurückzuführen sind.
- Ich bin mir bewusst, dass die in der Studieninformation genannten Pflichten einzuhalten sind. Im Interesse meiner Gesundheit kann mich ein Studienmitarbeiter jederzeit von der Studie ausschliessen.

|                   |                                         |
|-------------------|-----------------------------------------|
| <b>Ort, Datum</b> | <b>Unterschrift Studienteilnehmende</b> |
|-------------------|-----------------------------------------|

**Bestätigung des Studienmitarbeiters:** Hiermit bestätige ich, dass ich dieser Studienteilnehmerin/diesem Studienteilnehmer Wesen, Bedeutung und Tragweite der Studie erläutert habe. Ich versichere, alle im Zusammenhang mit dieser Studie stehenden Verpflichtungen gemäss dem geltenden Recht zu erfüllen. Sollte ich zu irgendeinem Zeitpunkt während der Durchführung der Studie von Aspekten erfahren, welche die Bereitschaft der Studienteilnehmerin/des Studienteilnehmers zur Teilnahme an der Studie beeinflussen könnten, werde ich sie/ ihn umgehend darüber informieren.

|                   |                                                                    |
|-------------------|--------------------------------------------------------------------|
| <b>Ort, Datum</b> | <b>Name und Vorname des Studienmitarbeiters in Druckbuchstaben</b> |
|                   | <b>Unterschrift des Studienmitarbeiters</b>                        |
